# Supplementary material
Source: PubMed Central journal article supplement (PMC2964223)
Supplement: 1007559107_pnas.1007559107_SI.pdf [file 1007559107_pnas.1007559107_SI.pdf]

# Supporting Information

Desai and Miller 10.1073/pnas.1007559107

## SI Materials and Methods

**Expression and Purification of MurA.** The *murA* gene was PCR amplified from *E. coli* strain MG1655 and cloned between the *NdeI* and *XhoI* sites of pET-22b so that a hexa-histidine tag was added to the C terminus. This construct was transformed into BL21 (DE3) and protein was produced by inoculating 0.5 L of LB with ampicillin (100  $\mu\text{g}/\text{mL}$ ) and growing the culture to an  $\text{OD}_{600}$  of 0.8 at 37°C. IPTG was then added to 0.5 mM, growth was continued for 2 h and cells were pelleted by centrifugation. The cell pellet was resuspended in buffer A [50 mM Tris-HCl pH 8.0, 300 mM NaCl, 4 mM dithiothreitol (DTT) and 40 mM imidazole] and extracts were prepared by passage through a French Press followed by centrifugation. The supernatant was loaded onto a nickel-nitrilotriacetic acid column that had been equilibrated with buffer A. The column was washed with 10 column volumes of buffer A, followed by 10 column volumes of buffer A containing 65 mM imidazole. The enzyme was eluted in buffer A containing 250 mM imidazole. Covalently bound PEP was removed by incubation of MurA with 1 mM UDP-GlcNAc for 10 min at 25°C. Purified enzyme was dialyzed against  $2 \times 1$  L changes of dialysis buffer (25 mM triethanolamine-HCl pH 8.0, 1 mM TCEP and 1 mM EDTA). The concentration of MurA was determined from absorbance readings at 280 nm using a calculated extinction coefficient of  $18,825 \text{ M}^{-1} \text{ cm}^{-1}$  (ExpASY).

**Expression and Purification of MurB.** The plasmid encoding MurB was isolated from the ASKA collection and transformed into MC4100. MurB was produced by inoculating 0.5 L of LB containing chloramphenicol and induced as described for MurA. MurB was also purified as described for MurA except that buffer A consisted of 50 mM Tris-HCl pH 8.0, 0.5 mM DTT and 40 mM imidazole. Purified MurB was dialyzed overnight against 2 L of 50 mM Tris-HCl pH 8.0 with 0.5 mM DTT. The concentration of MurB was calculated with an extinction coefficient of  $11,700 \text{ M}^{-1} \text{ cm}^{-1}$  using absorbance readings at 463 nm from bound FAD (1).

**Detection of Alkylated MurA.** MurA (20  $\mu\text{M}$ ) was incubated in 200  $\mu\text{L}$  of dialysis buffer containing bromoacetate (400  $\mu\text{M}$ ) at 25°C for 1 h. An identical control incubation mixture was prepared but not exposed to bromoacetate. Incubation mixtures were desalted by applying 50  $\mu\text{L}$  to a Sephadex G-50 spin column. Desalted MurA was prepared for tryptic digestion by bringing the mixture to 25 mM ammonium bicarbonate, 1 M urea and 1 mM DTT. Trypsin (500 ng) was added and the mixture was incubated overnight at 37°C. Digestions were desalted with  $\text{C}_{18}$  Zip-Tips and eluted with 50% acetonitrile/0.1% trifluoroacetic acid containing  $\alpha$ -cyano-4-hydroxycinnamic acid (10 mg/mL). Mass

spectra were acquired on a Shimadzu Axima CFR plus in positive reflectron mode.

**Inactivation Assays.** Assays were performed in 1 mL mixtures of 100 mM triethanolamine-HCl pH 8.0 containing various amounts of bromoacetate and MurA (5  $\mu\text{M}$ ) at 25°C. Control experiments revealed that, in the absence of bromoacetate, the activity of MurA remained constant in the assay mixture over the time frame of the experiment. Studies that tested the effect of UDP-GlcNAc on the rate of inactivation included this molecule at 1 mM. At various time intervals, 100  $\mu\text{L}$  aliquots were assayed for residual activity in a continuous assay using MurB as the coupling enzyme, essentially as previously described (2). The assay mixture contained 50 mM Tris-HCl pH 8.0, 20 mM KCl, 200  $\mu\text{M}$  NADPH, 1 mM PEP, 1 mM UDP-GlcNAc, 1 mM DTT, 20 mM glucose, 20 units of glucose oxidase, and 1  $\mu\text{M}$  MurB. Percent residual activity,  $f(t)$ , was plotted as a function of incubation time ( $t$ ) and data were fit to the single-exponential equation,  $f(t) = 100 \times e^{-k_{\text{obs}}t}$ , where  $k_{\text{obs}}$  is the observed first-order rate constant of inactivation at a given bromoacetate concentration. The second-order inactivation rate ( $k_{\text{inact}}$ ) was obtained by plotting  $k_{\text{obs}}$  values vs. bromoacetate concentrations ( $x$ ) and fitting data to  $f(x) = k_{\text{inact}}x$ , where  $f(x)$  is  $k_{\text{obs}}$ .

**Uncatalyzed Rate Assays.** Assays were performed in 10 mL mixtures at 25°C containing 100 mM HEPES pH 7.0, 0.5 mM L-glutathione and either 29 mM or 58 mM bromoacetate. At various time points 1 mL was removed and quenched by the addition of *N*-ethylmaleimide to 20 mM. An assay was also prepared that contained bromoacetate but not glutathione, serving as the blank to correct for the hydrolysis of bromoacetate over the time course of the experiment. After reactions had been quenched at all of the required time points, the bromide concentration was determined, as described above, and is equal to the concentration of glutathione that reacted with bromoacetate. Percent glutathione remaining,  $f(t)$ , was plotted as a function of incubation time ( $t$ ) and data were fit to the single-exponential equation,  $f(t) = 100 \times e^{-k_{\text{obs}}t}$ , where  $k_{\text{obs}}$  is the observed first-order rate constant of the uncatalyzed conjugation of glutathione to bromoacetate at a given bromoacetate concentration. The second-order uncatalyzed rate constant ( $k_{\text{uncat}}$ ) was obtained by plotting the observed first-order rate constants ( $k_{\text{obs}}$ ) vs. the bromoacetate concentration ( $x$ ) and fitting data to  $f(x) = k_{\text{uncat}}x$ , where  $f(x)$  is  $k_{\text{obs}}$ . The kinetic values reported are the mean values from two separate experiments with the errors representing the deviation from the mean.

1. Benson TE, Marquardt JL, Marquardt AC, Etzkorn FA, Walsh CT (1993) Overexpression, purification, and mechanistic study of UDP-N-acetylenolpyruvylglucosamine reductase. *Biochemistry* 32:2024–2030.

2. Schönbrunn E, Eschenburg S, Krekel, F, Luger, K, Amrhein N (2000) Role of the loop containing residue 115 in the induced-fit mechanism of the bacterial cell wall biosynthetic enzyme MurA. *Biochemistry* 39:2164–2173.
